# Supplementary material for: R2 and R2/R1 hybrid non-autonomous retrotransposons derived by internal deletions of full-length elements
Source: PubMed Central journal article supplement (PMC3414825; doi:10.1186/1759-8753-3-10), 2012-05-23
Supplement: 1759-8753-3-10-S1.pdf [file 1759-8753-3-10-S1.pdf]

|               |          |                            |                                   |                     |                                        |
|---------------|----------|----------------------------|-----------------------------------|---------------------|----------------------------------------|
|               |          | GGTACC-ACGGGT (xx bp)      | GGGAGTATCGTGGTGGTTG-TGGTT (xx bp) | GAGTTGCGTT ( xx bp) | AGAAGAGGTGTTAGATAGGCCT-CGCTCCTCACCAAGG |
| R1DmerA       | (646 bp) | T.A...-...A(44 bp)         | .....T.....-(25 bp)               | .C...AA.C( 5 bp)    | ..-C.GA.GT.A.....-...C...G.....A       |
| R1DfaA        | (401 bp) | .....(45 bp)               | .....( 5 bp)                      | .C.....( 10 bp)     | ..GA..T..C.....GC--T..-..CT.A.....     |
| R1DteA        | (295 bp) | ..A...C.....(44 bp)        | A.....-.....TA.( 6 bp)            | .C.....( 10 bp)     | ..GA.AC..C.....GT--T..-..GC.....       |
| R1DpuA        | (534 bp) | ..A...-.....(44 bp)        | .....G.....-( 6 bp)               | .C.....( 11 bp)     | ..GAG.C..C.....GC-TTC-GA.C.T..GT.....  |
| R1DanA        | (142 bp) | .....(43 bp)               | .....(39 bp)                      | .....( 30 bp)       | ..T.....A.....CA.T.-.....              |
| R1DwiA        | (704 bp) | .....T-.....A(47 bp)       | .....A...C.....(39 bp)            | .....( 28 bp)       | ..C.....T.....G.....T...C...           |
| R1DtaA        | (144 bp) | .....(43 bp)               | .....(39 bp)                      | .....C( 30 BP)      | ..T..G.A.T.-.....AT.C-T.....G.....     |
| R1DmeA        | (145 bp) | .....(43 bp)               | .....(40 bp)                      | .....A..G.( 39 bp)  | ..T...A.T...G..AT..-.....G.....        |
| R1DpsA        | ( 30 bp) | .....(41 bp)               | .....(43 bp)                      | .....C.( 28 bp)     | G.....C.....CA...-...C.....            |
| R1DviB        | (171 bp) | .....(53 bp)               | .....(36 bp)                      | .....C( 29 bp)      | G.....C-.....T...-..TG..AA.....        |
| R1DreB        | (537 bp) | .....(51 bp)               | .....(35 bp)                      | .....( 30 bp)       | G.C.....A-...G.....                    |
| R1DteB        | (603 bp) | ..G.-.....(53 bp)          | .....(37 bp)                      | ..CC.....( 30 bp)   | ..T.....T...G.....-..A.....            |
| R1DgrB        | (482 bp) | .....(55 bp)               | .....T.....(38 bp)                | TT.....C.( 29 bp)   | G...TC..T...G...GG-..C...AA.....       |
| R1DanB        | (537 bp) | .....(50 bp)               | .....CTA.....(38 bp)              | .....( 30 bp)       | G.....-.....C.AT..T.A...G...           |
| R1DimB        | (239 bp) | .....A(51 bp)              | .....C.....(37 bp)                | .....( 30 bp)       | ..C.....A.....-.....T.....             |
| R2/R1Dwi_SIDE | ( 85 bp) | .....T-.....A(43 bp)       | .....A...C.....(37 bp)            | .....AAA( 25 bp)    | ..C.....T...G.C.....-..CT...-...A      |
| R2/R1Dfa_SIDE | ( 88 bp) | .....(52 bp)               | .....C..A.....(39 bp)             | .....A( 30 bp)      | G.....A.T.A.....T..-..GC.....          |
| R2/R1Din_SIDE | ( 88 bp) | .....(52 bp)               | .....C.....A.....(39 bp)          | .....A( 30 bp)      | GA.....A.T.A.....T..-..GC.....         |
| R2/R1Dim_SIDE | (122 bp) | .....G(42 bp)              | T...C--.....(34 bp)               | T...TG... (284 bp)  | T.....-..GC.C.G.....-.....T...G.A      |
|               |          | ( xx bp)TACCGTGGTTGT-AATCC | (xx bp)GGAACACGCC-ACGTTAAACA      | (xx bp)             |                                        |
| R1DmerA       | (121 bp) | .....-...A..( 8 bp)        | ..T.....-(13 bp)                  |                     |                                        |
| R1DfaA        | (129 bp) | .....C.-.....( 5 bp)       | .....-(22 bp)                     |                     |                                        |
| R1DteA        | (126 bp) | .....-.....( 6 bp)         | ...G.....-.....T.(23 bp)          |                     |                                        |
| R1DpuA        | (127 bp) | .....-.....( 6 bp)         | A...G.....-.....T.(22 bp)         |                     |                                        |
| R1DanA        | (142 bp) | ..G.....-.....( 9 bp)      | .....-(27 bp)                     |                     |                                        |
| R1DwiA        | (135 bp) | .....-...A..( 9 bp)        | ..T...T.-.....T.(12 bp)           |                     |                                        |
| R1DtaA        | (135 bp) | ..G.....-.....(10 bp)      | .....T...-.....T.( 9 bp)          |                     |                                        |
| R1DmeA        | (151 bp) | ..G.....-.....( 9 bp)      | .....-...A...T.(28 bp)            |                     |                                        |
| R1DpsA        | (139 bp) | CG.....A-.....( 8 bp)      | .....-.....A...T.(23 bp)          |                     |                                        |
| R1DviB        | ( 95 bp) | A.....AGAT.-..G..( 5 bp)   | ..C.GGT..TC.....G.C(12 bp)        |                     |                                        |
| R1DreB        | ( 94 bp) | C.....AGAT.-..G..( 5 bp)   | ..C.GGA..TC.....(12 bp)           |                     |                                        |
| R1DteB        | ( 91 bp) | C.....AAAT.-..G..( 5 bp)   | ..C.GGA.TTC.....(12 bp)           |                     |                                        |
| R1DgrB        | (101 bp) | C.....AGAT.-..G..( 5 bp)   | ..C.GGT..TC.....C(12 bp)          |                     |                                        |
| R1DanB        | (109 bp) | GG.....AGAT.-..G..( 5 bp)  | ..C.GGT..TC.....(13 bp)           |                     |                                        |
| R1DimB        | (102 bp) | C.....AGATC-..G..( 5 bp)   | ..C.GGT.TTC...A...C(14 bp)        |                     |                                        |
| R2/R1Dwi_SIDE | (134 bp) | ..G.....A..T..A..( 9 bp)   | ..T.....-...A.....(12 bp)         |                     |                                        |
| R2/R1Dfa_SIDE | (118 bp) | .....A.-.....( 6 bp)       | ..C.....-.....T.(23 bp)           |                     |                                        |
| R2/R1Din_SIDE | ( 93 bp) | .....A.-.....( 6 bp)       | ..C.....-.....T.(23 bp)           |                     |                                        |
| R2/R1Dim_SIDE | (100 bp) | C.....AGATC-..G..( 5 bp)   | ..C.GGT.TTC...A...C(13 bp)        |                     |                                        |
