# Supplementary material for: R2 and R2/R1 hybrid non-autonomous retrotransposons derived by internal deletions of full-length elements
Source: PubMed Central journal article supplement (PMC3414825; doi:10.1186/1759-8753-3-10), 2012-05-23

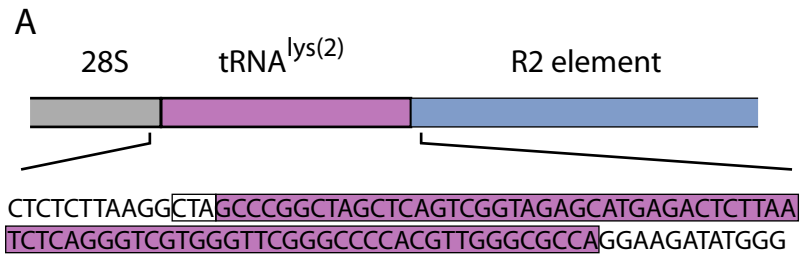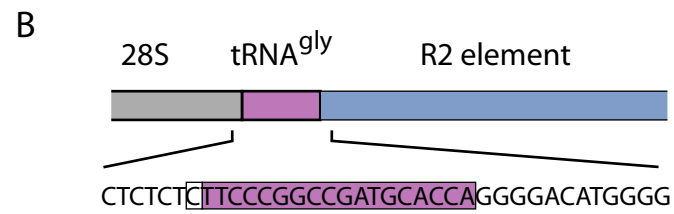

Supplement: 1759-8753-3-10-S2.pdf [file 1759-8753-3-10-S2.pdf]
